# Supplementary material for: E-cigarette and cigarette purchasing among young adults before and after implementation of California’s tobacco 21 policy
Source: HighWire-hosted journal article supplement (doi:10.1136/tobaccocontrol-2019-055417), 2020-02-27
Supplement: tobaccocontrol-2019-055417supp002_data_supplement.pdf [file tobaccocontrol-2019-055417supp002_data_supplement.pdf]

**Supplemental Table 2. Cigarette (N = 95) and e-cigarette (N= 62) purchase refusals of under 21 year old participants Post-T21 stratified by gender, race/ethnicity, and ALA grade, among past 30-day users**

|                    | Cigarette Purchase Refusals |                  |                 | E-cigarette Purchase Refusals |                  |                 |
|--------------------|-----------------------------|------------------|-----------------|-------------------------------|------------------|-----------------|
|                    | Total<br>N (Col %)          | Yes<br>N (Row %) | No<br>N (Row %) | Total<br>N (Col %)            | Yes<br>N (Row %) | No<br>N (Row %) |
| Gender             |                             |                  |                 |                               |                  |                 |
| Male               | 64 (67.4%)                  | 15 (23.4)        | 46 (71.9)       | 42 (67.7%)                    | 4 (9.5)          | 37 (88.1)       |
| Female             | 31 (32.6%)                  | 12 (38.7)        | 18 (58.1)       | 20 (32.3%)                    | 3 (15.0)         | 16 (80.0)       |
| Race/Ethnicity     |                             |                  |                 |                               |                  |                 |
| Non Hispanic White | 42 (44.2%)                  | 14 (33.3)        | 26 (61.9)       | 30 (48.4%)                    | 3 (10.0)         | 27 (90.0)       |
| Hispanic White     | 44 (46.3%)                  | 10 (22.7)        | 32 (72.7)       | 23 (37.1%)                    | 1 (4.3)          | 20 (87.0)       |
| Other              | 9 (9.5%)                    | 3 (33.3)         | 6 (66.7)        | 9 (14.5%)                     | 3 (33.3)         | 6 (66.7)        |
| ALA Grade          |                             |                  |                 |                               |                  |                 |
| A                  | 21 (22.1%)                  | 5 (23.8)         | 13 (61.9)       | 9 (14.5%)                     | 1 (11.1)         | 8 (88.9)        |
| C                  | 9 (9.5%)                    | 2 (22.2)         | 7 (77.8)        | 5 (8.1%)                      | 1 (20.0)         | 4 (80.0)        |
| F                  | 65 (68.4%)                  | 20 (30.8)        | 44 (67.7)       | 48 (77.4%)                    | 5 (10.42)        | 41 (85.4)       |

\*Excluded those who selected "Did not try to buy." Responses of "Don't know" are included in the totals and percentages but are not reported in the table.
